# Supplementary material
Source: PubMed Central journal article supplement (PMC3311960)
Supplement: NIHMS360058-supplement-Supplementary_Information.pdf [file NIHMS360058-supplement-Supplementary_Information.pdf]

# **CHEMISTRY**

---

## **A EUROPEAN JOURNAL**

---

### Supporting Information

© Copyright Wiley-VCH Verlag GmbH & Co. KGaA, 69451 Weinheim, 2011

#### **Metal-Ion-Dependent Folding of a Uranyl-Specific DNAzyme: Insight into Function from Fluorescence Resonance Energy Transfer Studies**

**Ying He<sup>[b]</sup> and Yi Lu<sup>\*[a, b]</sup>**

chem\_201100352\_sm\_miscellaneous\_information.pdf

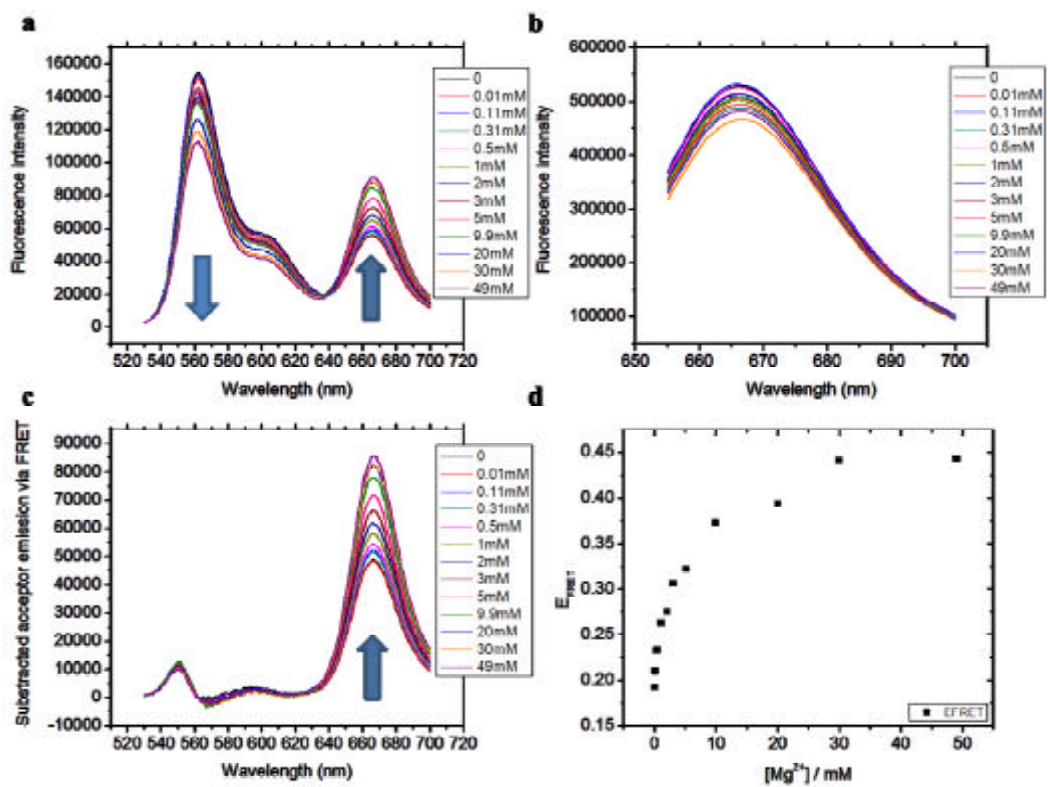

Figure S1. Sample emission spectra of Cy3 donor and Cy5 acceptor of the  $\text{UO}_2^{2+}$ -specific DNzyme, and  $E_{\text{FRET}}$  obtained by the  $(\text{ratio})_A$  method in the presence of increasing concentrations of metal ions. The sample spectra shown here are from  $\text{Mg}^{2+}$  titrations in 50 mM  $\text{NaNO}_3$  and 50 mM  $\text{Na-MES}$  buffer (pH 5.5) containing 100 mM  $[\text{Na}^+]$  when the stem II and III are labeled with Cy5 and Cy3, respectively (see the labeling scheme in Figure 1e): a) emission spectra of Cy3 (at 562 nm) and Cy5 (at 666 nm) when system is irradiated at Cy3 excitation wavelength of 513 nm. With increasing  $\text{Mg}^{2+}$  concentration, the 562 nm peak intensity decreases while the 666 nm peak intensity increase, indicating an increased energy transfer process; b) emission spectra of Cy5 when system is irradiated at Cy5 excitation wavelength of 648 nm. With increasing  $\text{Mg}^{2+}$  concentration, the 666 nm peak intensity decreases to a small extent, due to the small dilution effect; c) emission spectra of Cy5 after subtracting Cy3 emission contributions in a) above; d) A plot of  $E_{\text{FRET}}$  against  $\text{Mg}^{2+}$  concentration obtained from b) and c) using  $(\text{ratio})_A$  method. With increasing  $\text{Mg}^{2+}$  concentration, the  $E_{\text{FRET}}$  increases, indicating a folding process. The  $E_{\text{FRET}}$  values obtained from the  $(\text{ratio})_A$  method excludes the dilution effect shown in the fluorescence spectra in a)-c), representing a more accurate FRET change.

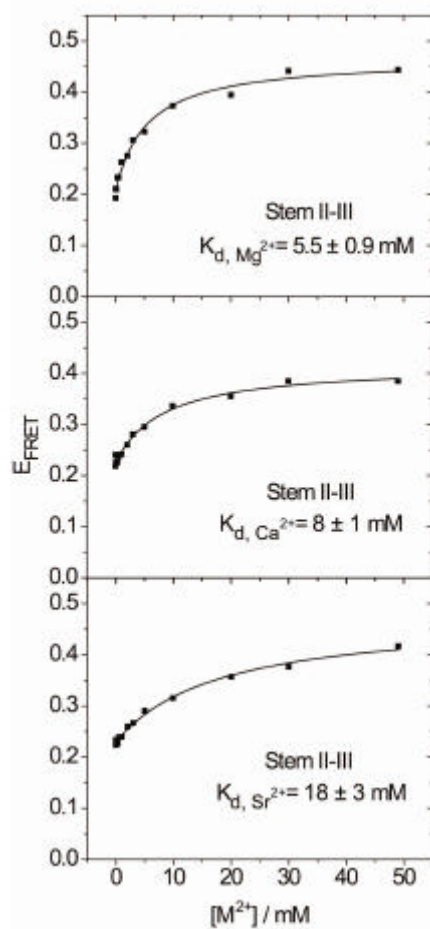

Figure S2. Plots of  $E_{\text{FRET}}$  versus the concentrations of Group IIA metal-ions ( $\text{Mg}^{2+}$ ,  $\text{Ca}^{2+}$ ,  $\text{Sr}^{2+}$ ) of the  $\text{UO}_2^{2+}$ -specific DNAzyme in 50 mM  $\text{NaNO}_3$  and 50 mM Na-MES buffer (pH 5.5) containing 100 mM  $[\text{Na}^+]$  when the stem II and III are labeled with Cy5 and Cy3, respectively (see the labeling scheme in Figure 1e).
